# Supplementary material for: Exfoliated fluorinated carbons with a low and stable friction coefficient
Source: Royal Society of Chemistry journal article supplement (doi:10.1039/c9ra01267b), 2019-01-01
Supplement: c9ra01267b1.pdf [file c9ra01267b1.pdf]

## Supplementary information

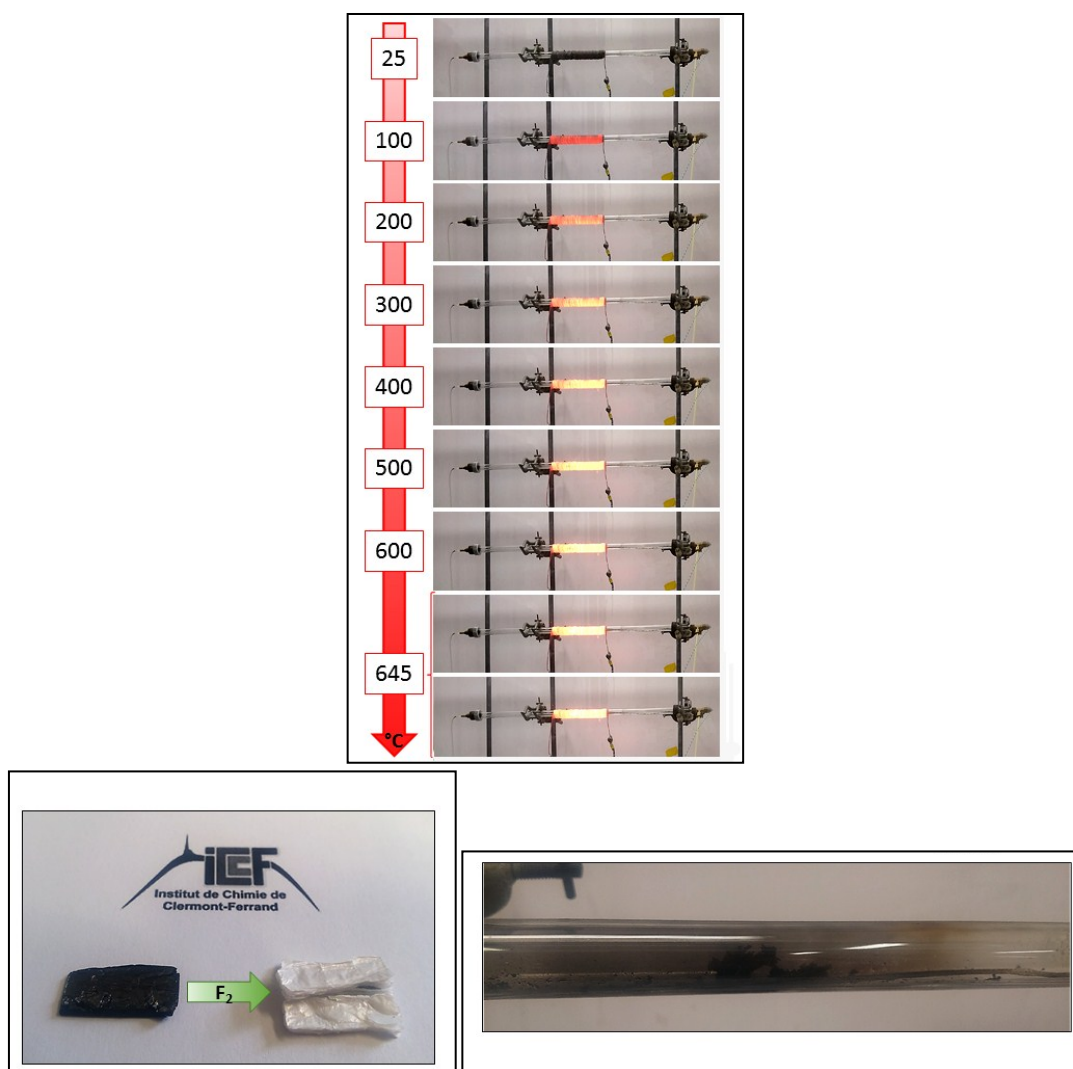

Figure SI 1: Picture of the experimental setup used for the fast thermal exfoliation of fluorinated carbons and pictures of the morphology of the *FG* before (white and thin) and after the exfoliation (black and exfoliated)
